# Convolutional Neural Network Model to Detect COVID-19 Patients Utilizing Chest X-ray Images

Md. Shahriare Satu<sup>a</sup>, Khair Ahammed<sup>b</sup>, Mohammad Zoynul Abedin<sup>c</sup>, Md. Auhidur Rahman<sup>b</sup>, Sheikh Mohammed Shariful Islam<sup>d</sup>, AKM Azad<sup>e</sup>, Salem A. Alyami<sup>f</sup>, Mohammad Ali Moni<sup>g,\*</sup>

<sup>a</sup>*Department of Management Information Systems, Noakhali Science and Technology University, Bangladesh*

<sup>b</sup>*Institute of Information Technology, Noakhali Science and Technology University, Bangladesh*

<sup>c</sup>*Department of Finance and Banking, Hajee Mohammad Danesh Science and Technology University, Bangladesh*

<sup>d</sup>*Institute for Physical Activity and Nutrition, Deakin University, Australia*

<sup>e</sup>*iThree Institute, Faculty of Science, University Technology of Sydney, Australia*

<sup>f</sup>*Department of Mathematics and Statistics, Imam Mohammad Ibn Saud Islamic University, Saudi Arabia*

<sup>g</sup>*WHO Collaborating Centre on eHealth, UNSW Digital Health, School of Public Health and Community Medicine, Faculty of Medicine, UNSW Sydney, Australia.*

---

## Abstract

This study aims to propose a deep learning model to detect COVID-19 positive cases more precisely utilizing chest X-ray images. We have collected and merged all the publicly available chest X-ray datasets of COVID-19 infected patients from Kaggle and Github, and pre-processed it using random sampling approach. Then, we proposed and applied an enhanced convolutional neural network (CNN) model to this dataset and obtained a 94.03% accuracy, 95.52% AUC and 94.03% f-measure for detecting COVID-19 positive patients. We have also performed a comparative performance between our proposed CNN model with several state-of-the-art machine learning classifiers including support vector machine, random forest, k-nearest neighbor, logistic regression, gaussian naïve bayes, bernoulli naïve bayes, decision tree, Xgboost, multilayer perceptron, nearest centroid and perceptron as well as

---

\*Corresponding Author

*Email address: m.moni@unsw.edu.au (Mohammad Ali Moni)*

*Preprint submitted to Machine Learning with Applications*

*March 13, 2021*

deep learning and pre-trained models such as deep neural network, residual neural network, visual geometry group network 16, and inception network V3 were employed, where our model yielded outperforming results compared to all other models. While evaluating the performance of our models, we have emphasized on specificity along with accuracy to identify non-COVID-19 individuals more accurately, which may potentially facilitate the early detection of COVID-19 patients for their preliminary screening, especially in under-resourced health infrastructure with insufficient PCR testing systems and testing facilities. Moreover, this model could also be applicable to the cases of other lung infections.

*Keywords:* COVID-19, Chest-Xray Images, Machine Learning, Deep Learning, Convolutional Neural Network

---

## 1. Introduction

Novel coronavirus disease (COVID-19) is an ongoing pandemic caused by severe acute respiratory syndrome coronavirus 2 (SARS-CoV-2) (Stoecklin et al., 2020). The first case of COVID-19 was believed to be detected at Wuhan, China in December 2019 and it had been spread rapidly throughout the world (Holshue et al., 2020). It has been reported that viruses from the *Coronaviridae* family were discovered in 1960s from the nasal pits of patients (Lippi & Plebani, 2020). It is a massive infectious group that enveloped ribonucleic acid (RNA) viruses and generated different types of respiratory, hepatic and neurological diseases among humans and other mammals (Zhu et al., 2020; Guan et al., 2020). It contains a large family of viruses where some of them induced community transmissions, such as the middle east respiratory syndrome (MERS-CoV) and severe acute respiratory syndrome (SARS-CoV). The SARS-CoV, MERS-CoV and SARS-CoV-2 were reported to be originated from bats (Lu et al., 2020), but, however, SARS-CoV-2 has been found to have phylogenetic similarity with SARS-CoV (Zhu et al., 2020). It causes COVID-19 that makes the third coronavirus emergent condition after the past two decades, preceded by the SARS-CoV and MERS-CoV outbreak in 2002 and 2012, respectively. The World Health Organization (WHO) has announced this situation as a public health emergency of international concern on 30<sup>th</sup> January and declared the situation as a *pandemic* on 11<sup>th</sup> March, 2020 (Dutta et al., 2020). Moreover, WHO issued public health advises to maintain different precautions like keep social distancing,

24 wash hand with soap and sanitizer, avoid touching nose, mouth, and eye etc.  
25 However, most of the affected countries underwent a completed locked-down  
26 to prevent the local transmission of COVID-19 infection in their regions.  
27 However, SARS-CoV-2 infected patients were commonly identified primarily  
28 with some common symptoms such as fever, cough, fatigue, loss of appetite,  
29 muscle pain etc. Hence, they were needed to identify, isolate and ensure the  
30 treatment policy at early stages. There are existing two types of procedures,  
31 namely i) molecular diagnostic tests, and ii) serologic tests (Organization  
32 et al., 2020). The reverse transcription polymerase chain reaction (RT-PCR)  
33 test is a molecular diagnostic test, which is currently considered as the gold  
34 standard (Butt et al., 2020) that detects the viral RNA of SARS-CoV-2  
35 from sputum or nasopharyngeal swab. Nevertheless, it is relatively associ-  
36 ated with true positive rate and required specific equipment (Butt et al.,  
37 2020). Another technique is currently under development that are explored  
38 virus proteins to identify COVID-19 called viral antigen detection. When  
39 a patient has been recovered and needed to test again, the molecular tests  
40 cannot detect this disease for longer periods as the growth of the antibody  
41 may be shown in its reaction to the host. Serologic test is another primary  
42 tool to verify antibodies in blood and diagnose patients. Due to lack of anal-  
43 ysis and skilled human resources, these procedures are time consuming and  
44 sometimes unavailable for many people especially in low and middle income  
45 countries, which, therefore, demands an alternate but cheaper solution for  
46 early diagnostics of COVID-19 infections fast as possible.

47 Recently, medical images such as chest X-ray and computed tomography  
48 (CT) scan images have been used to determine COVID-19 positive cases (Ng  
49 et al., 2020; Liu et al., 2020). But, CT scan imaging is a costly procedure and  
50 not available in every hospital or medical centers. Alternatively, chest X-ray  
51 scanning machines are found in almost all the nearest clinic, medical lab or  
52 hospitals rather than biomolecular laboratory test. So, it is cheaper, faster  
53 and widely-used way to generate 2D images of the patients (Kroft et al.,  
54 2019), that can potentially be used for COVID-19 patients as well. More-  
55 over, radiologists have used these images to explore its pathology and detect  
56 relevant diseases. Most of the existing works were implemented machine  
57 learning algorithms into medical images for detecting COVID-19 patients  
58 and focused on how classifiers were adopted to identify positive cases, but  
59 failed to detect false negative cases that cause more community transmission  
60 of COVID-19, requiring more stringent attention on the specificity measure

61 of those model predictions. In this study, we proposed a convolutional neu-  
62 ral network (CNN) to investigate chest X-ray images and identify COVID-19  
63 patients in early stage more precisely with higher specificity, that may aid  
64 public health systems to reduce the local community transmission rate.

65 This paper is organized as follows: Section 2 provides some related works  
66 about chest X-ray image analysis. Then, section 3 describes about working  
67 dataset and step-by-step procedure of how we can analyze it using machine  
68 learning (ML) and deep learning (DL) models. Section 4 shows the ex-  
69 perimental outcomes and Section 5 explains the performance of this work.  
70 Finally, Section 6 concludes this work by providing some future research  
71 directions.

## 72 **2. Literature Review**

73 Several studies have reported the use of medical images of COVID-19  
74 infection for further investigation using various machine and deep learning  
75 methods. Wang et al. (2020) generated a large benchmark dataset with  
76 13,975 chest X-ray images called COVIDx and investigated them using deep  
77 learning model that showed 93.30% accuracy. Abbas et al. (2020) proposed  
78 DeTraC deep CNN model that gave solution by transferring knowledge from  
79 generic object recognition to domain-specific tasks. Their algorithm showed  
80 95.55% accuracy (specificity of 91.87%, and a precision of 93.36%). Apos-  
81 tolopoulos & Mpesiana (2020) implemented transfer learning using CNNs  
82 into a small medical image dataset (1427 X-ray images), which provided high-  
83 est 96.78% accuracy, 98.66% sensitivity, and 96.46% specificity respectively.  
84 Karar et al. (2020) proposed a deep CNN architecture called COVIDX-Net  
85 that investigated 50 chest X-ray images with 25 COVID-19 cases and pro-  
86 vided 90% accuracy and 91% F-score. Minaee et al. (2020) proposed a deep  
87 learning framework based on 5000 images named COVID-Xray-5k where they  
88 applied ResNet18, ResNet50, SqueezeNet and Densenet-121 into them and  
89 produced sensitivity 97.5% and specificity 90% on average. Heidari et al.  
90 (2020) used transfer learning based VGG16 model into chest x-ray images  
91 which showed 94.5% accuracy, 98.4% sensitivity and 98% specificity. Again,  
92 Khan et al. (2020) represented a deep neural network based on Xception  
93 named CoroNet that provided 89.6% accuracy for four class and 95% accu-  
94 racy for three class images. Chandra et al. (2021) used two-phase classifi-  
95 cation approach that extracted majority vote based ensemble classifier and

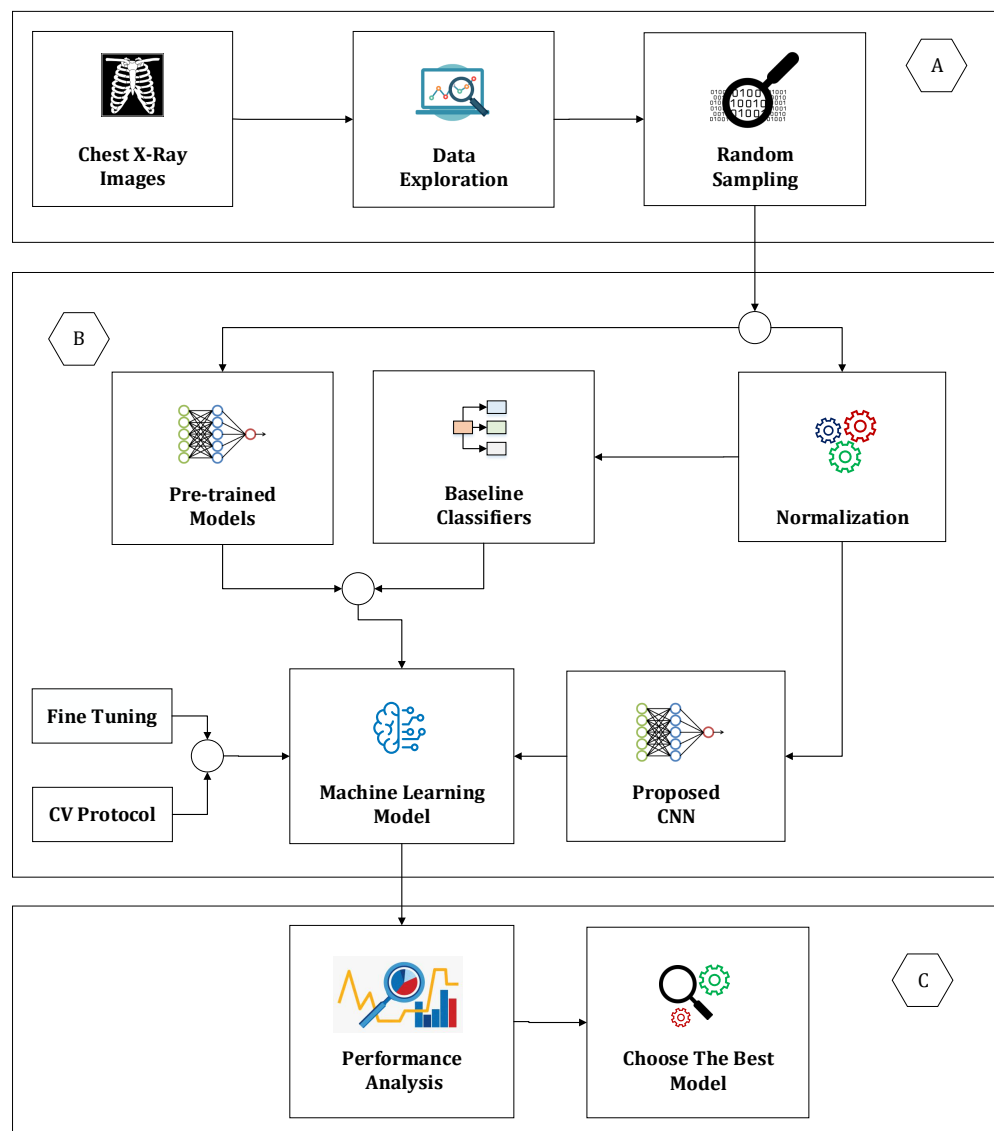

Figure 1: A schematic diagram of our overall workflow, where (A) chest X-Ray data has been preprocessed (B) Build a machine learning model where proposed CNN has been implemented into input images along with baseline and pre-trained models (C) Analyze the performance of proposed CNN with baseline and pre-trained models and identify the best model

96 showed 91.03% accuracy to detect COVID-19 from pneumonia. Also, Is-  
97 mael & Şengür (2021) used several deep learning approaches, namely deep  
98 feature extraction with SVM, fine tuning pre-trained CNN, and end-to-end  
99 trained CNN model, which classified COVID-19 and normal chest X-ray im-  
100 ages. Karthik et al. (2020) proposed a customized CNN with distinctive  
101 filter learning module that shows 97.94% accuracy and 96.90% F1-score for  
102 predicting four classes respectively. Ohata et al. (2021) proposed an auto-  
103 matic detection model where MobileNet with the SVM (linear kernel) pro-  
104 vides 98.5% accuracy and an F1-score and DenseNet201 with MLP shows  
105 95.6% accuracy and an F1-score for COVID-19 infection based on chest X-  
106 ray images. Moura et al. (2020) investigated 1616 chest X-ray images using  
107 DenseNet161 where it shows 79.89% accuracy to classify normal, pathologi-  
108 cal and COVID-19 patients. Duran-Lopez et al. (2020) represented a custom  
109 CNN based model named COVID-XNet that shows 94.43% average accu-  
110 racy, 98.8% AUC, 96.33% sensitivity, and 93.76% specificity respectively.  
111 Shorfuzzaman & Hossain (2020) provided a siamese neural network called  
112 MetaCOVID to integrate contrastive learning with a fine-tuned pre-trained  
113 ConvNet encoder and capture unbiased feature representations using 10-shot  
114 learning scores and compared among the meta learning algorithm with Incep-  
115 tionV3, Xception, Inception, ResNetV2, and VGG16. Shankar & Perumal  
116 (2020) proposed fusion model hand-crafted with deep learning features (FM-  
117 HCF-DLF) that used multi-layer perceptron (MLP) and InceptionV3 where  
118 MLP generated 94.08% accuracy.

### 119 3. Materials and Methods

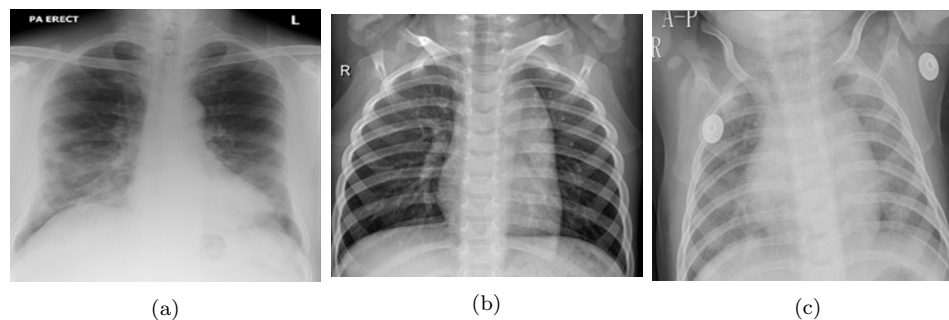

Figure 2: Chest X-ray images of (a) COVID-19 (b) normal and (c) viral pneumonia patients

120 The working methodology has been used to detect COVID-19 patients  
121 from the publicly available datasets. Figure 1 illustrates these steps that  
122 can be split into different sections such as data collection, pre-processing,  
123 classification and evaluation respectively. This approach is described briefly  
124 as follows:

### 125 *3.1. Data Collection*

126 The primary chest X-ray images have been obtained from the COVID-19  
127 Radiography Database (Chowdhury et al., 2020). It contained 1,341 normal,  
128 1,345 viral pneumonia, and 219 COVID-19 patient’s images, which have been  
129 taken as primary dataset. However, the distribution of different types of im-  
130 ages was not the same. To balance this dataset, we collected 66 images  
131 from Cohen et al. (2020) and added them with COVID-19 images of pri-  
132 mary dataset. For other classes (normal and pneumonia), a random under-  
133 sampling method has been used and generated balanced instances of each  
134 class. Finally, this experimental dataset had been contained 285 normal,  
135 viral pneumonia and COVID-19 images respectively. For instance, Figure 2  
136 illustrates the three types of chest X-ray images, respectively.

### 137 *3.2. Data pre-processing*

138 In this step, we normalized training set into grayscale images. Then, all  
139 baseline classifiers have been implemented with transformed dataset respec-  
140 tively. But, pre-trained CNN models such as VGG16, ResNet50, InceptionV3  
141 cannot support grayscale images, hence we directly employed them into pri-  
142 mary dataset.

### 143 *3.3. Proposed Convolutional Neural Networks*

144 Convolutional Neural Networks (CNN) is a special class of artificial neural  
145 network (ANN) that manipulates an input layer along with the sequence of  
146 hidden and output layers. It maintains a sparse connection between layers  
147 and weights that shares them with output neurons in the hidden layers. Like  
148 regular ANN, CNN contains a sequence of hidden layers, which are denoted  
149 as convolutional and polling layer. In addition, the operations of these layers  
150 are called convolutional and polling operation, respectively. Alternatively,  
151 they are stacked to lead a series of fully connected layers followed by an  
152 output layer. In many research fields including image recognition, object  
153 detection, semantic segmentation and medical image analysis, CNN models  
154 yield considerably higher performances compared to the state-of-the-arts.

### 155 3.3.1. Convolutional Layer

156 Convolution layer is the core structure of a CNN that manipulates convo-  
157 lution operation (represented by  $*$ ) instead of general matrix multiplication.  
158 This layer accomplishes most of the computations of CNN model. The count  
159 of filters, size of local region, stride, and padding are mentioned as *hyper-*  
160 *parameters* of this layer. Convolution layers extract and learn about features  
161 using these filters. Hence, it is known as the feature extraction layer. These  
162 parameters are necessary where the similar filter is traversed across the whole  
163 image for a single feature. The main objective of this layer is to identify com-  
164 mon features of input images and map their appearance to the feature map.  
165 The convolution operation is given as:

$$F(i, j) = (I * K)(i, j) = \sum_m \sum_n I(i + m, j + n)K(m, n) \quad (1)$$

166 To introduce non-linearity, the output of each convolutional layer is fed  
167 to an activation function. Numerous activation functions are available but  
168 Rectified Linear Unit (ReLU) is widely used in the deep learning field. It is  
169 mathematically calculated as follows:

$$f(x) = \max(0, x) \quad (2)$$

170 In this model, we have used fewer layers and filters, which consists of two  
171 convolutional layers and gradually increased the number of filters from 32 to  
172 64, respectively, where an image of size  $100 \times 100$  and the *pixel* values of them  
173 are either 0 or 1. In the first convolutional layer, this image is convoluted  
174 with  $3 \times 3$  kernel for 32 filters and produces the feature map  $100 \times 100 \times 32$ .  
175 Subsequently, this output has been forwarded to the second convolutional  
176 layer where we consider  $3 \times 3$  sized kernel for 64 filters that is also convoluted  
177 with  $100 \times 100 \times 32$  extracted features and produced  $100 \times 100 \times 64$  sized  
178 output feature map is produced in this layer.

### 179 3.3.2. Pooling Layer

180 In CNN, the sequence of convolution layer is followed by an optional  
181 pooling or down sampling layer to lessen the volume of input images and  
182 number of parameters. This layer computes fast and precludes over-fitting.  
183 The most common pooling technique is called *Max Pooling*, which merely  
184 generates the highest result of the input region. Other pooling options are  
185 *average pooling* and *sum pooling*. Two hyper-parameters are essential for the



186 pooling layer, namely filter and stride. In this model, we implement  $2 \times 2$   
187 filter into  $100 \times 100 \times 64$  sized output feature map and create  $50 \times 50 \times 64$   
188 reduced feature map.

### 189 3.3.3. Flatten layer

190 After implementing the pooling layer, a flatten layer has been employed  
191 to flat the entire network. It converts the entire pooled feature map matrix  
192 into a single column.

### 193 3.3.4. Dense layer

194 Then, we have implemented three dense layers which are also known as a  
195 fully connected layer. In this layer, the input of previous layers is flattened  
196 from a matrix into a vector and forwarded it to this layer like a neural  
197 network. This layer viewed the output of past layers and decided which  
198 features are mostly matched with the individual class. Therefore, a fully  
199 connected layer can yield accurate probabilities for the different classes. The  
200 outputs are classified by using the activation function at the output layer,  
201 which in our case was the *Softmax function* to calculate the probability of  
202 particular classes defined by the following this equation:

$$Z^k = \frac{e^{x^k}}{\sum_{i=1}^n e^{x^n}} \quad (3)$$

### 203 3.3.5. Dropout layer

204 When a large *feed-forward* neural network is investigated with a small  
205 training set, it usually shows poor performance on held-out test data, and  
206 *dropout* is a useful procedure to mitigate this problem. In our model, we used  
207 dropout layer after each dense layer and to reduce over-fitting by preventing  
208 complex co-adaptations on the training data.

### 209 3.4. Baseline classifiers

210 Several machine learning classifiers have been used to perform compara-  
211 tive performance assessments, such as support vector machine (SVM), ran-  
212 dom forest (RF), k-nearest neighbor (k-NN), logistic regression (LR), gaus-  
213 sian naïve bayes (GNB), Bernoulli naïve bayes (BNB), decision tree (DT),  
214 Xgboost (XGB), multilayer perceptron (MLP), nearest centroid (NC) and

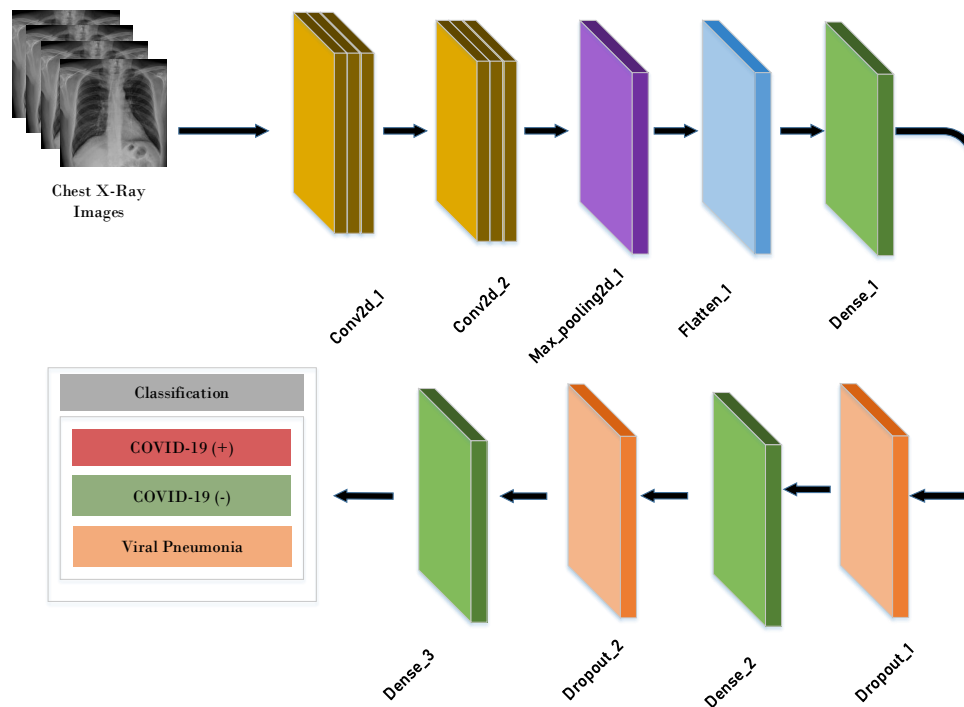

Figure 3: Proposed Convolution Neural Network

215 perceptron. While training with pre-processed dataset, several model hyper-  
216 parameters were fine-tuned (i.e. changed and optimized) to get better pre-  
217 dictive accuracy. These parameters of baseline classifiers are represented in  
218 Table 2.

### 219 3.5. Pre-trained transfer learning models

220 Moreover, several deep learning classifiers were employed such as deep  
221 neural network (DNN) and several pre-trained CNNs like residual neural  
222 network (ResNet50), visual geometry group network 16 (VGG16), and in-  
223 ception network V3 (InceptionV3) for transfer learning. These models have  
224 been widely used to investigate images in various domains (Ahammed et al.,  
225 2020; Satu et al., 2020, 2019). Like general classifiers, various parameters  
226 were tuned to get more accurate result for detecting COVID-19. For DNN,  
227 we considered the batch-size as 32, number of epochs as 50, the 'adam' op-  
228 timizer, and the learning rate as 0.0001 with *weight decay*. Again, some

Table 1: A summary of proposed 9 layers model

| Layer(Type)                       | Output Shape   | Param #  |
|-----------------------------------|----------------|----------|
| conv2d_1 (Conv2D)                 | (100, 100, 32) | 320      |
| conv2d_2 (Conv2D)                 | (100, 100, 64) | 18496    |
| max_pooling2d_1<br>(MaxPooling2D) | (50,50,64)     | 0        |
| flatten_1 (Flatten)               | 160000         | 0        |
| dense_1 (Dense)                   | 120            | 19200120 |
| dropout_1 (Dropout)               | 120            | 0        |
| dense_2 (Dense)                   | 60             | 7260     |
| dropout_2 (Dropout)               | 60             | 0        |
| dense_3 (Dense)                   | 3              | 183      |
| Total params: 19,226,379          |                |          |
| Trainable params: 19,226,379      |                |          |
| Non-trainable params: 0           |                |          |

229 regularization terms have been employed for reducing overfitting in the deep  
230 learning models. When pre-trained models have been loaded, it was down-  
231 loaded requiring packages to manipulate input images. Then, the flatten  
232 layer was added into these pre-trained models, which flattens the input to  
233 one dimension. Then, we implemented a dense layer with 64 neurons, the  
234 'relu' activation function and the regularizer as 0.001, respectively. Before  
235 and after employing the dense layer, dropout layer has been used to reduce  
236 the over-fitting issues. Finally, three classes have been assigned with the  
237 'softmax' activation function. To compile the model, categorical\_crossentropy  
238 loss function and adam optimizer were taken with 0.00001 learning rate.  
239 Therefore, we used last 1 trainable layer for ResNet50 and considered the  
240 last 62 trainable layers for InceptionV3.

### 241 3.6. Evaluation

242 The performance of individual classifiers was assessed by different evalu-  
243 ation metrics such as *accuracy*, *AUC*, *F-measure*, *sensitivity*, and *specificity*,  
244 respectively. The brief description of them is given in Table 3.

Table 2: Different model parameters of classical machine learning classifiers

| Classifier | Parameters                                        |
|------------|---------------------------------------------------|
| SVM        | linear kernel, gamma = 0.0001                     |
| KNN        | k= 5, euclidean distance                          |
| GNB        | priors = None, var_smoothing = $1e^{-09}$         |
| BNB        | alpha = 1.0, binarize = 0.0                       |
| DT         | gini criterion, best splitter                     |
| LR         | liblinear solver, max_iter = 1000                 |
| RT         | max_depth = None, random_state = 0                |
| GB         | max_features = 2, max_depth = 2, random_state = 0 |
| XGB        | learning_rate =0.1, max_depth = 3                 |
| MLP        | adam solver, alpha = $1e^{-5}$ , random_state = 1 |
| NC         | manhattan metric                                  |
| Perceptron | tol = $1e^{-3}$ , random_state = 0                |

#### 245 4. Experiment Results

246 In this work, proposed CNN was used to investigate chest X-ray images of  
247 normal, pneumonia and COVID-19 patients. We have used various classifiers,  
248 e.g. SVM, RF, KNN, LR, GNB, BNB, XGB, MLP, NC and perceptron using  
249 *scikit* learn library in python. Again, deep learning model such as DNN and  
250 pre-trained CNN models (VGG16, MobileNet, ResNet50) were implemented  
251 using *keras* library. Therefore, these classifiers were employed 10 fold cross  
252 validation procedure using python programming language. All applications  
253 have been implemented on a laptop with Asus VivoBook S, Core i5-8250U  
254 Processor 8th generation - (8 GB/1 TB HDD/Windows 10 Home/) Intel  
255 UHD Graphics 620.

256 The performance of all classifiers was assessed by different evaluation  
257 metrics: accuracy, AUC, F-measure, sensitivity, and specificity respectively.  
258 The results of these classifiers are shown in Table 4. Most of the models  
259 yielded substantially good predictive performances to classify chest X-ray  
260 images, where seven of them such as Proposed CNN, XGB, LR, SVM, MLP,  
261 RF and GB show the results greater than 90%, six classifiers like percep-  
262 tron, KNN, GNB, NC, DT and DNN represent their performance greater

Table 3: Evaluation Metrics

| Metrics     | Definition                                                                                           | Formula                                                                                         |
|-------------|------------------------------------------------------------------------------------------------------|-------------------------------------------------------------------------------------------------|
| Accuracy    | Accuracy is the summation of TP and TN divided by the total instance values of the confusion matrix. | $\text{Accuracy} = \frac{\text{TP} + \text{TN}}{\text{TP} + \text{FP} + \text{TN} + \text{FN}}$ |
| AUC         | It measures the capability of the model to distinguish between classes is called AUC.                | $\text{AUC} = \int_{x=0}^1 \text{TPR}(\text{FPR}^{-1}(x)) dx$                                   |
| F-Measure   | The harmonic mean of precision and recall is called F-Measure / F1-score.                            | $\text{F-Measure} = \frac{2\text{TP}}{2\text{TP} + \text{FP} + \text{FN}}$                      |
| Sensitivity | The ratio of true negatives that are correctly identified is called as sensitivity.                  | $\text{Sensitivity} = \frac{\text{TP}}{\text{TP} + \text{FN}}$                                  |
| Specificity | The ratio of true negatives that are correctly identified is called as specificity.                  | $\text{Specificity} = \frac{\text{TN}}{\text{TN} + \text{FP}}$                                  |

263 than 70% and less than 90%. Consequently, the rest of the classifiers for  
 264 instances, BNB and pre-trained CNNs such as ResNet50, VGG16, Incep-  
 265 tionV3 are provide less than 70% outcomes. The characteristics of these  
 266 neural network/regression-based classifiers are more realistic to investigate  
 267 COVID-19 dataset. The details of average results of different classifiers are  
 268 shown in Figure 4. Among all of these classifiers, proposed CNN shows the  
 269 highest accuracy (94.03%), AUROC (95.53%), F-measure (94.03%), sensi-  
 270 tivity (94.03%), and specificity (97.01%), where it classifies 272 COVID-19  
 271 instances from 285 instances accurately (see Table 5). Then, XGB, LR, SVM,  
 272 MLP, RF and GB demonstrate better results than other algorithms except  
 273 for CNN. Moreover, the average performance of all classifiers is satisfactory  
 274 for all evaluation metrics. We believed, due to the small number of COVID-  
 275 19 cases, these deep classifiers cannot show more accurate results like CNN  
 276 and others. Therefore, our proposed CNN model is found the best classifier to  
 277 identify both COVID-19 positive and negative cases with high performance  
 278 and can assist physician and policy maker to identify them quickly and take  
 279 necessary steps.

280 In the proposed CNN, some metrics like accuracy, f-measure and sensitiv-  
 281 ity are indicated how COVID-19 positive (target) cases can be determined.

Table 4: Performance Analysis of Classification Methods

| Classifier          | Accuracy      | AUC           | F-Measure     | Sensitivity   | Specificity   |
|---------------------|---------------|---------------|---------------|---------------|---------------|
| XGB                 | 0.9274        | 0.9456        | 0.9274        | 0.9274        | 0.9637        |
| LR                  | 0.9251        | 0.9438        | 0.9253        | 0.9251        | 0.9625        |
| SVM                 | 0.9228        | 0.9421        | 0.923         | 0.9228        | 0.9614        |
| MLP                 | 0.9157        | 0.9368        | 0.9163        | 0.9157        | 0.9578        |
| RF                  | 0.9064        | 0.9298        | 0.906         | 0.9064        | 0.9532        |
| GB                  | 0.9052        | 0.9289        | 0.9049        | 0.9052        | 0.9526        |
| Perceptron          | 0.8935        | 0.9201        | 0.8938        | 0.8935        | 0.9467        |
| KNN                 | 0.8538        | 0.8903        | 0.8558        | 0.8538        | 0.9269        |
| GNB                 | 0.8187        | 0.864         | 0.8155        | 0.8187        | 0.9093        |
| NC                  | 0.7988        | 0.8491        | 0.8009        | 0.7988        | 0.8994        |
| DT                  | 0.7883        | 0.8412        | 0.7889        | 0.7883        | 0.8941        |
| DNN                 | 0.7029        | 0.7772        | 0.7035        | 0.7029        | 0.8514        |
| ResNet50            | 0.6070        | 0.7052        | 0.5948        | 0.6070        | 0.8035        |
| VGG16               | 0.6035        | 0.7026        | 0.5816        | 0.6035        | 0.8017        |
| BNB                 | 0.5625        | 0.6719        | 0.5180        | 0.5625        | 0.7812        |
| InceptionV3         | 0.5298        | 0.6473        | 0.5314        | 0.5298        | 0.7649        |
| <b>Proposed CNN</b> | <b>0.9403</b> | <b>0.9552</b> | <b>0.9403</b> | <b>0.9403</b> | <b>0.9701</b> |

Table 5: Confusion Matrix of CNN

|                 |                 | Actual Class |        |                 |
|-----------------|-----------------|--------------|--------|-----------------|
|                 |                 | Covid-19     | Normal | Viral Pneumonia |
| Predicted Class | Covid-19        | 272          | 5      | 8               |
|                 | Normal          | 4            | 269    | 12              |
|                 | Viral Pneumonia | 8            | 14     | 263             |

282 Besides, they have been effective to explore and identify the target cases.  
 283 This model shows 94.03% accuracy, f-measure and sensitivity and 95.52%  
 284 AUC correspondingly. Besides, specificity is one of the most important terms  
 285 because it shows how COVID-19 negative patients can be explored more ac-  
 286 curately. The incremental result of specificity is denoted more appropriate  
 287 identification of COVID-19 negative cases. Hence, the community transmis-  
 288 sion has been reduced by these infectious persons whose were not detected

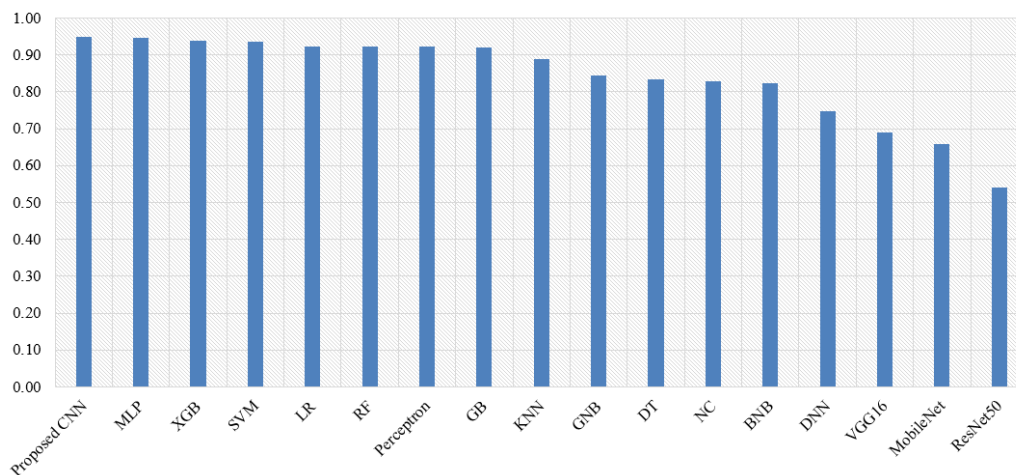

Figure 4: Average results of individual classifier

289 as positive cases precisely. Note, our proposed CNN has yielded the highest  
290 specificity (97.01%) among all the models evaluated in this work by outper-  
291 forming them (Table 4). Thus, the proposed CNN indicate its potentiality  
292 to avoid false positive cases.

#### 293 4.1. Comparison with Existing Works

294 In this work, several machine and deep learning classifiers were used to  
295 investigate chest X-ray images and detect COVID-19 positive cases rapidly.  
296 Most of the classifiers used in our work were widely implemented in earlier  
297 works with good predictive performances. Recently, many studies have been  
298 conducted related to COVID-19 chest X-ray image analysis, where some limi-  
299 tations were identified. Most of the works were focused on high sensitivity, i.e.  
300 how the classifiers can identify COVID-19 positive cases frequently (Karar  
301 et al., 2020; Karthik et al., 2020; Khan et al., 2020; Ismael & Şengür, 2021;  
302 Ohata et al., 2021). But, nowadays the community transmission is a great  
303 issue to prevent the spread of COVID-19 and the growth of false negative  
304 rates are accelerated, which is a great concern. So, in this work, we particu-  
305 larly focused on specificity (i.g. reduced false negative rates) along with other  
306 metrics. Our proposed CNN model shows better specificity (97.01%) than  
307 many existing works (Abbas et al., 2020; Apostolopoulos & Mpesiana, 2020;  
308 Minaee et al., 2020; Chandra et al., 2021; Duran-Lopez et al., 2020; Pandit  
309 & Banday, 2020). At the application level, the usage of our model may pre-  
310 vent COVID-19 community transmission by detecting false negative cases

311 more accurately. In this work, we verified experimental results using various  
312 evaluation metrics like accuracy, AUC, F-measure, sensitivity, and specificity  
313 respectively. Several works have analyzed a few number of COVID-19 sam-  
314 ples along with other cases where the experimental dataset was remained  
315 imbalanced (Karar et al., 2020; Sekeroglu & Ozsahin, 2020; Shankar & Pe-  
316 rumal, 2020; Zebin & Rezvy, 2020). Sometimes, they were conducted with  
317 a separate dataset where the scarcity of samples was found in both of these  
318 datasets (Apostolopoulos & Mpesiana, 2020; Shankar & Perumal, 2020). In  
319 the proposed model, we integrated COVID-19 samples of related datasets in  
320 addition to balance the target classes named normal and viral pneumonia  
321 using random *under-sampling* in view of these samples. Some works have  
322 improved their results, specially, accuracy by merging non-COVID classes  
323 (e.g., class 3 to 2) (Apostolopoulos & Mpesiana, 2020). It is realized that  
324 normal and viral pneumonia are hardly associated with COVID-19. In our  
325 current study, we considered these conditions and analyze them to justify  
326 this epidemic situation. Many state-of-the-arts of CNN, such as pre-trained  
327 transfer learning models are available, which investigated chest X-ray images  
328 to classify COVID-19 (Apostolopoulos & Mpesiana, 2020; Abbas et al., 2020;  
329 Pandit & Banday, 2020). But, they were not shown better results for only  
330 855 samples. If we will increase the number of images in another condition,  
331 it decreases the risk of false positive rate. In recent works, none justify their  
332 work with machine learning based classifier along with deep learning (Apos-  
333 tolopoulos & Mpesiana, 2020; Karar et al., 2020). Besides, our approach  
334 provides a solution for gathering small and a large number of chest X-images  
335 to investigate COVID-19 cases.

## 336 5. Discussions

337 Many techniques have been using the RT-PCR test and viral antigen  
338 detection techniques to identify COVID-19 cases, but none reported to claim  
339 the 100% accuracy in this case. Besides, most of this existing process are cost-  
340 heavy, time-consuming and requires specific instructions to implement them.  
341 However, sample collection is from a large population is a slow process and  
342 hence, the infection may remain undetected. Instead, chest-X-ray images  
343 are more accessible than other diagnostic measures. To tackle community  
344 transmission, in addition to better predictability, the testings should also  
345 be vigilant against false negative prediction as that undetected cases will  
346 further trigger more infections. Physicians and healthcare workers cannot



347 take proper steps when many patients are admitted to the hospital. If these  
348 cases are detected at an early stage, they can isolate themselves from the  
349 community and give possible treatment rapidly that reduces the transmission  
350 rate of COVID-19. Therefore, we needed a suitable tool to detect COVID-19  
351 positive and negative cases more feasible way. Our proposed CNN model can  
352 automatically detect these cases more accurately with high specificity (see  
353 Section 4.1). In this work, we focused on COVID-19 negative cases so that  
354 community transmission is unchained as strongly as possible. Besides, due to  
355 social lock-down, collection of large-scale medical images along with chest-  
356 X-ray images and investigate them using machine learning models in this  
357 pandemic situation may not be feasible. But, our proposed CNN is capable  
358 of yielding higher predictive performance even though being trained with a  
359 small number of samples compared to the existing works.

360 The pandemic condition getting severe day-by-day in recent times. Differ-  
361 ent sectors such as agriculture, business, finance are impeded rapidly during  
362 this period. Many people lose their jobs and do not manage new oppor-  
363 tunities due to the lock-down situation. SARS-CoV-2 transmission rate is  
364 extremely high, and hence, any undetected COVID-19 case may potentially  
365 spread out this disease throughout their community rapidly. Therefore, early  
366 detection via cost-effective tools with high predictive power is highly required  
367 to recognize cases and take proper steps as soon as possible. High specificity  
368 from our proposed CNN model could successfully reduce false negative rates  
369 by detecting subtle cases, that can significantly affect not only the public  
370 health but consequently re-induce the social and economic normality.

## 371 **6. Conclusion and Future Work**

372 The study proposed a CNN model, which analysed chest X-ray images  
373 of COVID-19, healthy and other viral pneumonia patients to classify and di-  
374 agnosis COVID-19 patients automatically in a short period of time. Again,  
375 various machine and deep learning-based approach are used to compare the  
376 performance and the outcomes of our proposed CNN model. Hence, proposed  
377 CNN yielded the highest 94.01% accuracy and 97.01% specificity, while most  
378 of the deep learning methods did not provided good results like general clas-  
379 sifiers. Despite taking all the measures of avoiding over-fitting, the results of  
380 our proposed CNN model performed surprisingly well with small datasets,  
381 however, it would be interesting to see its performance with larger training  
382 dataset. Hence, in future, we will collect a large number of images from

383 various sources and analyze them to get more feasible outcomes. This ap-  
384 proach may be helpful for clinical practices and detection of COVID-19 cases  
385 to prevent future community transmission.

## 386 References

- 387 Abbas, A., Abdelsamea, M. M., & Gaber, M. M. (2020). Clas-  
388 sification of COVID-19 in chest X-ray images using DeTraC  
389 deep convolutional neural network. *Applied Intelligence*, . URL:  
390 [https://doi.org/10.1007/s10489-](https://doi.org/10.1007/s10489-020-01829-7)  
391 [020-01829-7](https://doi.org/10.1007/s10489-020-01829-7). doi:10.1007/s10489-  
392 Ahammed, K., Satu, M. S., Khan, M. I., & Whaiduzzaman, M. (2020).  
393 Predicting infectious state of hepatitis c virus affected patient’s applying  
394 machine learning methods. In *2020 IEEE Region 10 Symposium (TEN-*  
395 *SYMP)* (pp. 1371–1374). IEEE.
- 396 Apostolopoulos, I. D., & Mpesiana, T. A. (2020). Covid-19: automatic detec-  
397 tion from x-ray images utilizing transfer learning with convolutional neural  
398 networks. *Physical and Engineering Sciences in Medicine*, (p. 1).
- 399 Butt, C., Gill, J., Chun, D., & Babu, B. A. (2020). Deep learning system to  
400 screen coronavirus disease 2019 pneumonia. *Applied Intelligence*, (p. 1).
- 401 Chandra, T. B., Verma, K., Singh, B. K., Jain, D., & Netam,  
402 S. S. (2021). Coronavirus disease (COVID-19) detection in  
403 Chest X-Ray images using majority voting based classifier en-  
404 semble. *Expert Systems with Applications*, *165*, 113909. URL:  
405 <http://www.sciencedirect.com/science/article/pii/S0957417420307041>.  
406 doi:10.1016/j.eswa.2020.113909.
- 407 Chowdhury, M. E., Rahman, T., Khandakar, A., Mazhar, R., Kadir, M. A.,  
408 Mahbub, Z. B., Islam, K. R., Khan, M. S., Iqbal, A., Al-Emadi, N. et al.  
409 (2020). Can ai help in screening viral and covid-19 pneumonia? *arXiv*  
410 *preprint arXiv:2003.13145*, .
- 411 Cohen, J. P., Morrison, P., & Dao, L. (2020). Covid-  
412 19 image data collection. *arXiv 2003.11597*, . URL:  
413 <https://github.com/ieee8023/covid-chestxray-dataset>.

- 414 Duran-Lopez, L., Dominguez-Morales, J. P., Corral-Jaime, J.,  
415 Vicente-Diaz, S., & Linares-Barranco, A. (2020). COVID-  
416 XNet: A Custom Deep Learning System to Diagnose and Lo-  
417 cate COVID-19 in Chest X-ray Images. *Applied Sciences*, 10,  
418 5683. URL: <https://www.mdpi.com/2076-3417/10/16/5683>.  
419 doi:10.3390/app10165683. Number: 16 Publisher: Multidisciplinary  
420 Digital Publishing Institute.
- 421 Dutta, S., Bandyopadhyay, S. K., & Kim, T.-H. (2020). CNN-  
422 LSTM Model for Verifying Predictions of Covid-19 Cases. *Asian*  
423 *Journal of Research in Computer Science*, (pp. 25–32). URL:  
424 <https://www.journalajrcos.com/index.php/AJRCOS/article/view/30141>.  
425 doi:10.9734/ajrcos/2020/v5i430141.
- 426 Guan, W.-j., Ni, Z.-y., Hu, Y., Liang, W.-h., Ou, C.-q., He, J.-x., Liu, L.,  
427 Shan, H., Lei, C.-l., Hui, D. S. et al. (2020). Clinical characteristics of  
428 coronavirus disease 2019 in china. *New England journal of medicine*, 382,  
429 1708–1720.
- 430 Heidari, M., Mirniaharikandehi, S., Khuzani, A. Z., Danala, G., Qiu, Y.,  
431 & Zheng, B. (2020). Improving the performance of CNN to predict the  
432 likelihood of COVID-19 using chest X-ray images with preprocessing algo-  
433 rithms. *International Journal of Medical Informatics*, 144, 104284. URL:  
434 <http://www.sciencedirect.com/science/article/pii/S138650562030959X>.  
435 doi:10.1016/j.ijmedinf.2020.104284.
- 436 Holshue, M. L., DeBolt, C., Lindquist, S., Lofy, K. H., Wiesman, J., Bruce,  
437 H., Spitters, C., Ericson, K., Wilkerson, S., Tural, A. et al. (2020). First  
438 case of 2019 novel coronavirus in the united states. *New England Journal*  
439 *of Medicine*, .
- 440 Ismael, A. M., & Şengür, A. (2021). Deep learning ap-  
441 proaches for COVID-19 detection based on chest X-ray im-  
442 ages. *Expert Systems with Applications*, 164, 114054. URL:  
443 <http://www.sciencedirect.com/science/article/pii/S0957417420308198>.  
444 doi:10.1016/j.eswa.2020.114054.
- 445 Karar, M. E., Hemdan, E. E.-D., & Shouman, M. A. (2020). Cas-  
446 caded deep learning classifiers for computer-aided diagnosis of COVID-  
447 19 and pneumonia diseases in X-ray scans. *Complex & Intelli-*

- 448 *gent Systems*, . URL: <https://doi.org/10.1007/s40747-020-00199-4>.  
449 doi:10.1007/s40747-020-00199-4.
- 450 Karthik, R., Menaka, R., & M., H. (2020). Learning distinctive  
451 tive filters for COVID-19 detection from chest X-ray using shuffled  
452 residual CNN. *Applied Soft Computing*, (p. 106744). URL:  
453 <http://www.sciencedirect.com/science/article/pii/S1568494620306827>.  
454 doi:10.1016/j.asoc.2020.106744.
- 455 Khan, A. I., Shah, J. L., & Bhat, M. M. (2020). CoroNet: A deep neural  
456 network for detection and diagnosis of COVID-19 from chest x-ray images.  
457 *Computer Methods and Programs in Biomedicine*, 196, 105581. URL:  
458 <http://www.sciencedirect.com/science/article/pii/S0169260720314140>.  
459 doi:10.1016/j.cmpb.2020.105581.
- 460 Kroft, L. J., van der Velden, L., Girón, I. H., Roelofs, J. J., de Roos, A., &  
461 Geleijns, J. (2019). Added value of ultra-low-dose computed tomography,  
462 dose equivalent to chest x-ray radiography, for diagnosing chest pathology.  
463 *Journal of thoracic imaging*, 34, 179.
- 464 Lippi, G., & Plebani, M. (2020). Procalcitonin in patients with severe coronavirus  
465 disease 2019 (covid-19): a meta-analysis. *Clinica chimica acta; international journal of clinical chemistry*, 505, 190.
- 467 Liu, H., Liu, F., Li, J., Zhang, T., Wang, D., & Lan, W. (2020). Clinical and  
468 ct imaging features of the covid-19 pneumonia: Focus on pregnant women  
469 and children. *Journal of infection*, .
- 470 Lu, R., Zhao, X., Li, J., Niu, P., Yang, B., Wu, H., Wang, W., Song, H.,  
471 Huang, B., Zhu, N. et al. (2020). Genomic characterisation and epidemiology  
472 of 2019 novel coronavirus: implications for virus origins and receptor  
473 binding. *The Lancet*, 395, 565–574.
- 474 Minaee, S., Kafieh, R., Sonka, M., Yazdani, S., & Jamalipour Soufi, G.  
475 (2020). Deep-COVID: Predicting COVID-19 from chest X-ray images  
476 using deep transfer learning. *Medical Image Analysis*, 65, 101794. URL:  
477 <http://www.sciencedirect.com/science/article/pii/S1361841520301584>.  
478 doi:10.1016/j.media.2020.101794.

- 479 Moura, J. D., García, L. R., Vidal, P. F. L., Cruz, M., López,  
480 L. A., Lopez, E. C., Novo, J., & Ortega, M. (2020). Deep Con-  
481 volutional Approaches for the Analysis of COVID-19 Using Chest X-  
482 Ray Images From Portable Devices. *IEEE Access*, 8, 195594–195607.  
483 doi:10.1109/ACCESS.2020.3033762. Conference Name: IEEE Access.
- 484 Ng, M.-Y., Lee, E. Y., Yang, J., Yang, F., Li, X., Wang, H., Lui, M. M.-s.,  
485 Lo, C. S.-Y., Leung, B., Khong, P.-L. et al. (2020). Imaging profile of the  
486 covid-19 infection: radiologic findings and literature review. *Radiology:  
487 Cardiothoracic Imaging*, 2, e200034.
- 488 Ohata, E. F., Bezerra, G. M., Chagas, J. V. S. d., Neto, A. V. L., Albu-  
489 querque, A. B., Albuquerque, V. H. C. d., & Filho, P. P. R. (2021). Auto-  
490 matic detection of COVID-19 infection using chest X-ray images through  
491 transfer learning. *IEEE/CAA Journal of Automatica Sinica*, 8, 239–248.  
492 doi:10.1109/JAS.2020.1003393. Conference Name: IEEE/CAA Journal of  
493 Automatica Sinica.
- 494 Organization, W. H. et al. (2020). *Laboratory testing for coronavirus disease  
495 2019 (COVID-19) in suspected human cases: interim guidance, 2 March  
496 2020*. Technical Report World Health Organization.
- 497 Pandit, M. K., & Banday, S. A. (2020). SARS n-CoV2-19 de-  
498 tection from chest x-ray images using deep neural networks. *In-  
499 ternational Journal of Pervasive Computing and Communications*,  
500 16, 419–427. URL: <https://doi.org/10.1108/IJPCC-06-2020-0060>.  
501 doi:10.1108/IJPCC-06-2020-0060. Publisher: Emerald Publishing Limited.
- 502 Satu, M. S., Atik, S. T., & Moni, M. A. (2019). A novel hybrid machine learn-  
503 ing model to predict diabetes mellitus. In *International Joint Conference  
504 on Computational Intelligence* (pp. 453–465). Springer.
- 505 Satu, M. S., Rahman, S., Khan, M. I., Abedin, M. Z., Kaiser, M. S., &  
506 Mahmud, M. (2020). Towards improved detection of cognitive performance  
507 using bidirectional multilayer long-short term memory neural network. In  
508 *International Conference on Brain Informatics* (pp. 297–306). Springer.
- 509 Sekeroglu, B., & Ozsahin, I. (2020). Detection of COVID-  
510 19 from Chest X-Ray Images Using Convolutional Neural Net-  
511 works. *SLAS TECHNOLOGY: Translating Life Sciences Innova-*

- 512 *tion*, 25, 553–565. URL: <https://doi.org/10.1177/2472630320958376>.  
513 doi:10.1177/2472630320958376. Publisher: SAGE Publications Inc.
- 514 Shankar, K., & Perumal, E. (2020). A novel hand-crafted with  
515 deep learning features based fusion model for COVID-19 diagno-  
516 sis and classification using chest X-ray images. *Complex & Intelli-*  
517 *gent Systems*, . URL: <https://doi.org/10.1007/s40747-020-00216-6>.  
518 doi:10.1007/s40747-020-00216-6.
- 519 Shorfuzzaman, M., & Hossain, M. S. (2020). MetaCOVID: A Siamese  
520 neural network framework with contrastive loss for n-shot diagno-  
521 sis of COVID-19 patients. *Pattern Recognition*, (p. 107700). URL:  
522 <http://www.sciencedirect.com/science/article/pii/S0031320320305033>.  
523 doi:10.1016/j.patcog.2020.107700.
- 524 Stoecklin, S. B., Rolland, P., Silue, Y., Mailles, A., Campese, C., Simon-  
525 don, A., Mechain, M., Meurice, L., Nguyen, M., Bassi, C. et al. (2020).  
526 First cases of coronavirus disease 2019 (covid-19) in france: surveillance,  
527 investigations and control measures, january 2020. *Eurosurveillance*, 25,  
528 2000094.
- 529 Wang, L., Lin, Z. Q., & Wong, A. (2020). COVID-Net: a  
530 tailored deep convolutional neural network design for detection of  
531 COVID-19 cases from chest X-ray images. *Scientific Reports*, 10,  
532 19549. URL: <https://www.nature.com/articles/s41598-020-76550-z>.  
533 doi:10.1038/s41598-020-76550-z. Number: 1 Publisher: Nature Publishing  
534 Group.
- 535 Zebin, T., & Rezvy, S. (2020). COVID-19 detection and disease  
536 progression visualization: Deep learning on chest X-rays for clas-  
537 sification and coarse localization. *Applied Intelligence*, . URL:  
538 <https://doi.org/10.1007/s10489-020-01867-1>. doi:10.1007/s10489-  
539 020-01867-1.
- 540 Zhu, N., Zhang, D., Wang, W., Li, X., Yang, B., Song, J., Zhao, X., Huang,  
541 B., Shi, W., Lu, R. et al. (2020). A novel coronavirus from patients with  
542 pneumonia in china, 2019. *New England Journal of Medicine*, .
